# Supplementary material for: pH-induced recovery and redispersion of shape-controlled gold nanorods for nanocatalysis
Source: Royal Society of Chemistry journal article supplement (doi:10.1039/c5ra17369h), 2015-01-01
Supplement: c5ra17369h1.pdf [file c5ra17369h1.pdf]

Electronic Supplementary Information

# pH-Induced Recovery and Redispersion of Shape-Controlled Gold Nanorods for Nanocatalysis

Clara Morita-Imura\*, Takahiro Kobayashi, Yoshiro Imura, Takeshi Kawai, and Hitoshi Shindo\*

Department of Applied Chemistry, Chuo University, Kasuga, Bunkyo-ku, Tokyo 112-8551 (Japan)

\*cimura@kc.chuo-u.ac.jp, shindo@kc.chuo-u.ac.jp

## Size distribution of Au NRs

(A) As prepared Au NRs dispersion.

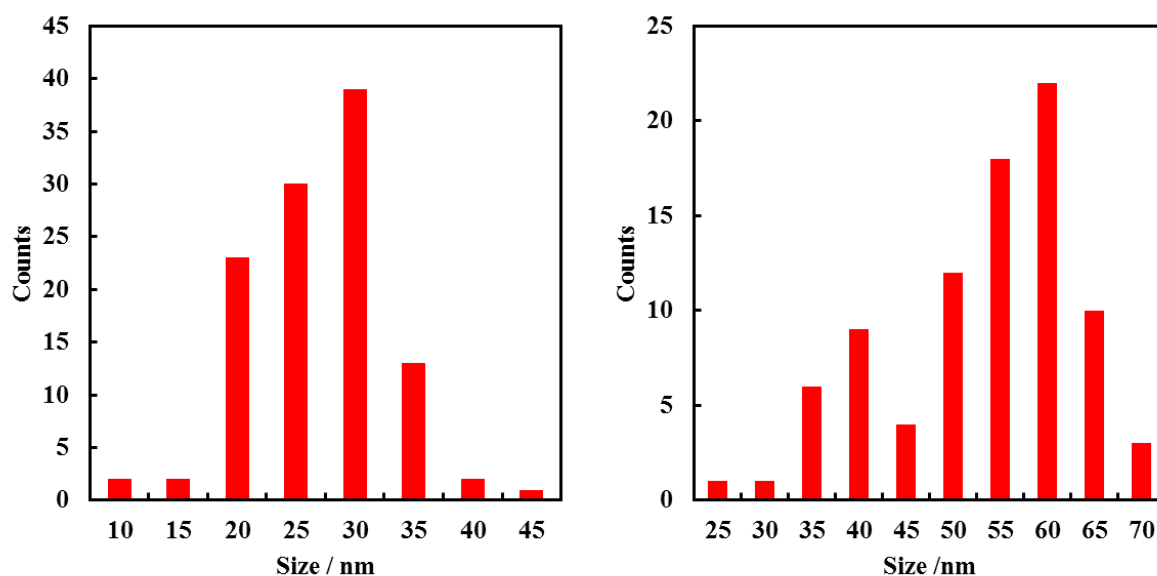

**Figure S1.** Size distribution of Au NRs in as-prepared dispersion. Left distributions show the size along the short axis and right distributions show the size along the long axis of NRs. Standard deviation = 5.62% (short axis), 10.1% (long axis).

(B) Initial dispersion.

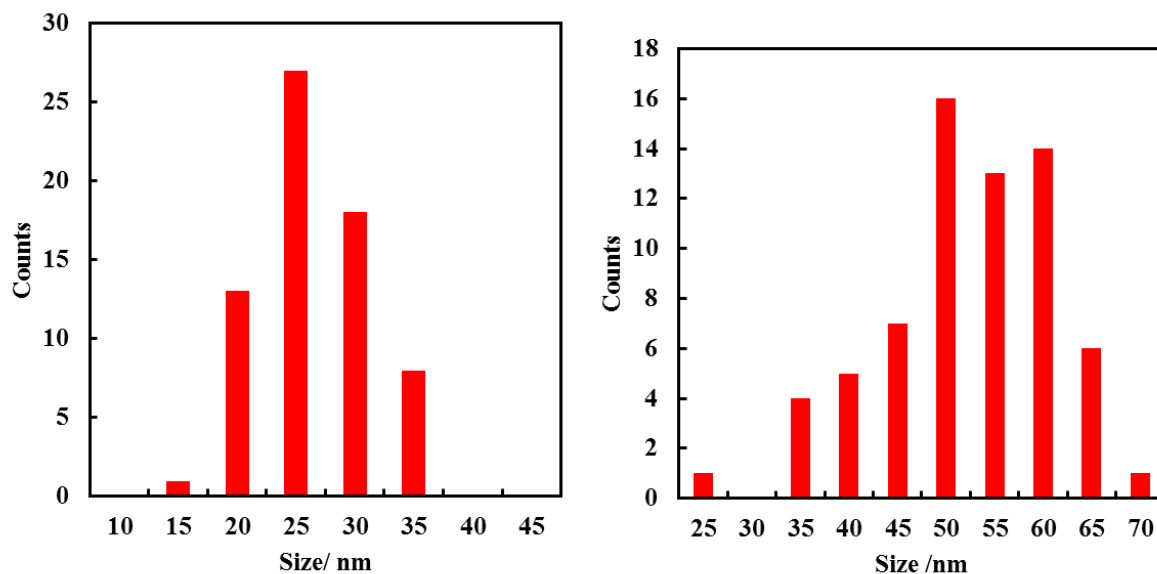

**Figure S2.** Size distribution of Au NRs in initial dispersion. Left distributions show the size along the short axis and right distributions show the size along the long axis of NRs. Standard deviation = 4.44% (short axis), 8.77% (long axis).

(C) Redispersion.

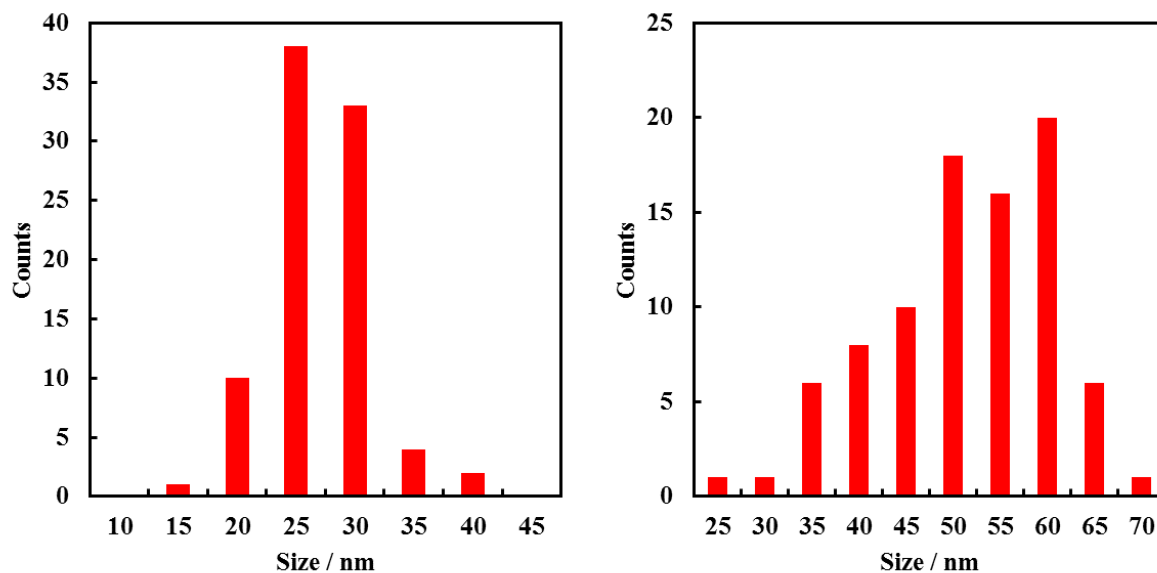

**Figure S3.** Size distribution of Au NRs in redispersion. Left distributions show the size along the short axis and right distributions show the size along the long axis of NRs. Standard deviation = 4.27% (short axis), 9.78 (long axis).
